# Supplementary material for: Diversity of Diurnal Raptors in a Suburban Area of a City in Southern Chile
Source: Research Square preprint supplement (doi:10.21203/rs.3.rs-500326/v1), 2021-05-20
Supplement: Supplementary file 1 [file c6f3c1f578ad2e51eb2f6e69.docx]

TABLE 1 Species of diurnal raptor recorded in five environments in a suburban area of Temuco, southern Chile, 2010-2011. F= Frequency; S= Species richness; H= Shannon-Wienner Index; H’ max= Expected maximum diversity; and J= Pielou Index.

­­____________ _______________________________________________________________________________________________________________

Species Prairie Scrub Exotic tree plantations Regeneration Dense forest

F % F % F % F % F %

­___________________________________________________________________________________________________

*F. sparverius* 11 2.68 1 1.47 0 0 1 6.25 2 0.72

*F. femoralis* 1 0.24 0 0 0 0 0 0 0 0

*F. peregrinus* 0 0 0 0 0 0 0 0 1 0.36

*M. chimango* 373 90.98 34 50 5 26.32 2 12.5 224 81.16

*E. leucurus* 6 1.46 0 0 0 0 2 12.5 0 0

*P. unicinctus* 13 3.17 811.76 421.05 2 12.5 5 1.81

*G. polyosoma* 6 1.46 25 36.76 1052.63 9 56.25 17 6.16

*B. ventralis* 0 0 0 0 0 0 0 0 25 9.06

*A. chilensis* 0 0 0 0 0 0 0 0 1 0.36

*C. plancus* 0 0 0 0 0 0 0 0 1 0.36

Total 410 100 68 100 19 100 16 100 276 100

________________________________________________________________________________________________________________

S 6 4 3 5 8

H’ 0.187 0.447 0.442 0.554 0.316

H’ max 0.778 0.602 0.477 0.699 0.903

J 0.24 0.742 0.926 0.793 0.35

TABLE 2. Land use of the study area, suburban area of Temuco, southern Chile.

_____________________________________________________________________

Area (ha) Percentage (%)

_____________________________________________________________________

Dense mature native forest 24 1.33

Medium density mature native forest 71 3.95

Medium density native forest to plantation 38 2.1

Medium density regeneration 7.6 0.4

Plantations of exotic species 430 24

Harvested exotic plantations 35 1.9

Medium density scrub 57 3.1

Open scrub 3.5 0.2

Open scrub with prairie 11 0.6

Perennial grasslands 26 1.44

Pasture-crop rotation 922 51

Fens 131 7.3

Other lands without vegetation 3.1 0.17

Urban zone 35 1.9

_____________________________________________________________________

Total 1794 100
